# Supplementary material for: Гигиенические аспекты условий труда в современном производстве винилхлоридаи поливинилхлорида
Source: Frontiers journal article supplement (doi:10.3389/fdgth.2021.748588), 2008-01-01
Supplement: Data_Sheet_1.PDF [file Data_Sheet_1.PDF]

## Overview of prescribed activities per wave

| Cat. <sup>a</sup> | Suggested activity                                                                     | Points | Proof | Waves     |
|-------------------|----------------------------------------------------------------------------------------|--------|-------|-----------|
| PA                | Shoot a ball on the crossbar of a goal                                                 | 25     | Video | . . . 4 . |
| PA                | Walk 3 kilometers with a dog                                                           | 25     | Video | . . . . 5 |
| PA                | Complete a workout via YouTube                                                         | 8      | Video | . . . . 5 |
| PA                | Do 100 push-ups                                                                        | 5      | Video | . . 3 . . |
| PA                | Go up and down the stairs 10 times                                                     | 5      | Video | 1 . . . . |
| PA                | Do some gardening                                                                      | 5      | Video | . . . 4 . |
| PA                | Do 30 lunges                                                                           | 4      | Video | . . . 4 . |
| PA                | Do a sports game that has you moving                                                   | 4      | Video | . 2 . . . |
| PA                | Do 30 squats                                                                           | 4      | Video | 1 . . 4 . |
| PA                | Jump rope for 1 minute                                                                 | 4      | Video | . . 3 . . |
| PA                | Do 10 burpees                                                                          | 4      | Video | 1 . . 5 . |
| PA                | Cover 2 kilometers in 10 minutes                                                       | 4      | Video | . . . . 5 |
| PA                | Run to the supermarket                                                                 | 4      | Video | . . 3 . . |
| PA                | Do an activity that makes you sweat                                                    | 4      | Video | 1 2 3 4 5 |
| PA                | Clean your room with a vacuum cleaner                                                  | 4      | Video | . . 3 . . |
| PA                | Empty the dishwasher                                                                   | 4      | Video | . . . . 5 |
| PA                | Imitate this yoga pose: 🧘                                                              | 4      | Video | . 2 . . . |
| PA                | Do 20 push-ups                                                                         | 3      | Video | 1 . . . 5 |
| PA                | Do 40 crunches                                                                         | 3      | Video | . 2 . . . |
| PA                | Find an object weighing exactly 15 kilos and place it on a scale                       | 3      | Video | . 2 . . . |
| PA                | Go for a bike ride                                                                     | 3      | Video | . 2 . . 5 |
| DI                | Cook a meal with potatoes, meat & vegetables                                           | 5      | Photo | 1 . . . . |
| DI                | Take a picture of a shopping cart with ingredients for a healthy meal                  | 5      | Photo | . 2 . . . |
| DI                | Take a picture of a healthy lunch                                                      | 5      | Photo | . . 3 . . |
| DI                | Drink 1 liter of water throughout the day                                              | 4      | Photo | . . . 4 . |
| DI                | Make a healthy smoothie                                                                | 4      | Photo | . 2 . . . |
| DI                | Fry an egg                                                                             | 3      | Photo | 1 . . . . |
| DI                | Peel a hard-boiled egg                                                                 | 3      | Photo | . . . . 5 |
| DI                | Bake a pancake                                                                         | 3      | Photo | . . 3 . . |
| DI                | Peel an apple peel of at least 20 centimeters                                          | 3      | Photo | . . . 4 . |
| DI                | Make an elephant from a tangerine                                                      | 3      | Photo | 1 . . . . |
| DI                | Have a cup of tea                                                                      | 2      | Photo | . . 3 . . |
| FR                | Get to know yourself: complete a personality test (i.e., using the mini-IPIP scales ?) | 25     | Photo | . . 3 . . |
| FR                | Wrestle arms with someone of at least 40+                                              | 25     | Photo | . . 3 . 5 |
| FR                | Watch a documentary on video game addiction                                            | 6      | Photo | . . . 4 . |
| FR                | Perform an act of kindness in times of the COVID-19 pandemic                           | 5      | Photo | 1 . . . . |
| FR                | Play a game of chess                                                                   | 4      | Photo | 1 . . . . |
| FR                | Play a game of checkers                                                                | 4      | Photo | . . 3 . . |
| FR                | Play a game of Ludo                                                                    | 4      | Photo | . . . 4 . |
| FR                | Play a game of Connect Four                                                            | 4      | Photo | . . . . 5 |
| FR                | Play a game of cards                                                                   | 4      | Photo | . 2 . . . |
| FR                | Skype with friends while doing a healthy activity                                      | 4      | Photo | 1 2 3 4 5 |
| FR                | Make a person laugh                                                                    | 3      | Photo | 1 . . . . |

<sup>a</sup> PA = physical activity; DI = dietary intake; FR = friends and relationships
